# Supplementary material for: A New Approach to Deliver Anti-cancer Nanodrugs with Reduced Off-target Toxicities and Improved Efficiency by Temporarily Blunting the Reticuloendothelial System with Intralipid
Source: PubMed Central journal article supplement (PMC5701028; doi:10.1038/s41598-017-16293-6), 2017-11-23
Supplement: 41598_2017_16293_MOESM1_ESM.pdf [file 41598_2017_16293_MOESM1_ESM.pdf]

## Supplementary Information

### **A New Approach to Deliver Anti-cancer Nanodrugs with Reduced Off-target Toxicities and Improved Efficiency by Temporarily Blunting the Reticuloendothelial System with Intralipid**

Li Liu<sup>1,2</sup>, Qing Ye<sup>1,3</sup>, Maggie Lu<sup>4</sup>, Shih-Ta Chen<sup>4</sup>, Hsiang-Wen Tseng<sup>4</sup>, Ya-Chin Lo<sup>4</sup>, and Chien Ho<sup>1\*</sup>

<sup>1</sup> Department of Biological Sciences, Carnegie Mellon University, Pittsburgh, PA

<sup>2</sup> Present address: National Institute of Neurological Disorders and Stroke, National Institute of Health, Bethesda, MD

<sup>3</sup> Present address: Department of Neurology, University of Pittsburgh School of Medicine, Pittsburgh, PA

<sup>4</sup> Drug Delivery Technology Department, Targeted Drug and Delivery Technology Division, Biomedical Technology and Device Research Laboratories, Industrial Technology Research Institute, Hsinchu, Taiwan

\* Correspondence to Chien Ho [chienho@andrew.cmu.edu], Department of Biological Sciences, Carnegie Mellon University, 4400 Fifth Ave, Pittsburgh, PA 15213, USA

## Supplementary Figure Captions

**Fig S1.** Changes of **(A)** the spleen weight, **(B-M)** liver pathological features, **(N)** serum creatinine level, and **(O)** ALT activity of rats upon administration of DACHPt/HANP (2 mg Pt/kg), with and without Intralipid treatment. N=6 for each group, i.e., the Intralipid-treated group and the control group. In **(A)**, the spleen weight/body weight ratios are shown as the percentage of the normal level. **(B-C, F-G, and J-K)** are the H&E-stained sections of the liver tissue; **(D-E, H-I, and L-M)** are the TUNEL-stained sections of the liver tissue. **(B-E)** are from the tissue sections of the DACHPt/HANP administered, PBS-treated control group; **(F-I)** are from the Intralipid-treated group. **(J-M)** are the tissue sections of the naïve SD rats. In **E** and **I**, the red arrows indicate the apoptotic cells and an enlarged view of the apoptotic cell is shown. In **N** and **O**, \* $p < 0.05$ .

**Fig S2.** Changes of **(A)** the spleen weight, and **(B-M)** liver pathological features of rats upon administration of Abraxane, with and without treatment with Intralipid. N=4 for each group, i.e., the Intralipid-treated group and the PBS-treated control group. In **(A)**, the spleen weight/body weight ratios are shown as the percentage of the normal level. **(B-C, F-G, and J-K)** are from the H&E-stained tissue sections; **(D-E, H-I, and L-M)** are from the TUNEL-stained tissue sections. **(B-E)** are from the tissue sections of the Abraxane administered, PBS-treated control group; **(F-I)** are from the Intralipid-treated group, **(J-M)** are from the tissue sections of the naïve SD rats. In **E** and **I**, the red arrows point to apoptotic cells and an enlarged view of the apoptotic cell is shown.

**Fig S3.** Changes of (A) the spleen weight, (B-I) the liver pathological features, (J) the serum creatinine level, and (K) the ALT activity of rats upon administration of Marqibo, with and without Intralipid treatment. N=6 for each group, i.e., the Intralipid-treated group and the PBS-treated control group. (B-C and F-G) are from the H&E-stained liver tissue sections; (D-E and H-I) are from the TUNEL-stained liver tissue sections. (B-E) are from the tissue sections of the Marqibo administered, PBS treated control group; (F-I) are from the Intralipid-treated group. In C and G, the black arrows point to the mitotic cells and an enlarged view of the mitotic cell is shown. In E and I, the red arrows point to the apoptotic cells. In J,  $p < 0.05$ .

**Fig S4.** Changes of (A) the spleen weight, (B-M) the liver pathological features, (N) the serum creatinine level, and (O) the ALT activity of rats upon administration of Onivyde, with and without treatment with Intralipid. N=6 for each group, i.e., the Intralipid-treated group and the control group. In (A), the spleen weight/body weight ratios are shown as the percentage of the normal level. (B-C, F-G, and J-K) are from the H&E-stained liver tissue sections; (D-E, H-I, and L-M) are from the TUNEL-stained liver tissue sections. (B-E) are from the tissue sections of the Onivyde administered, PBS-treated control group; (F-I) are from the Intralipid-treated group. (J-M) are from the tissue sections of the naïve SD rats. In E, J, and M, the red arrows point to the apoptotic cells.

**Fig S5.** Changes of the body weight of the BALB/c nude mice bearing human colon cancer HT-29 xenografts upon treatment (as indicated by the red arrows) with vehicle,

Intralipid alone, and DACHPt/HANP at 2 mg Pt/kg with or without Intralipid pre-treatment.

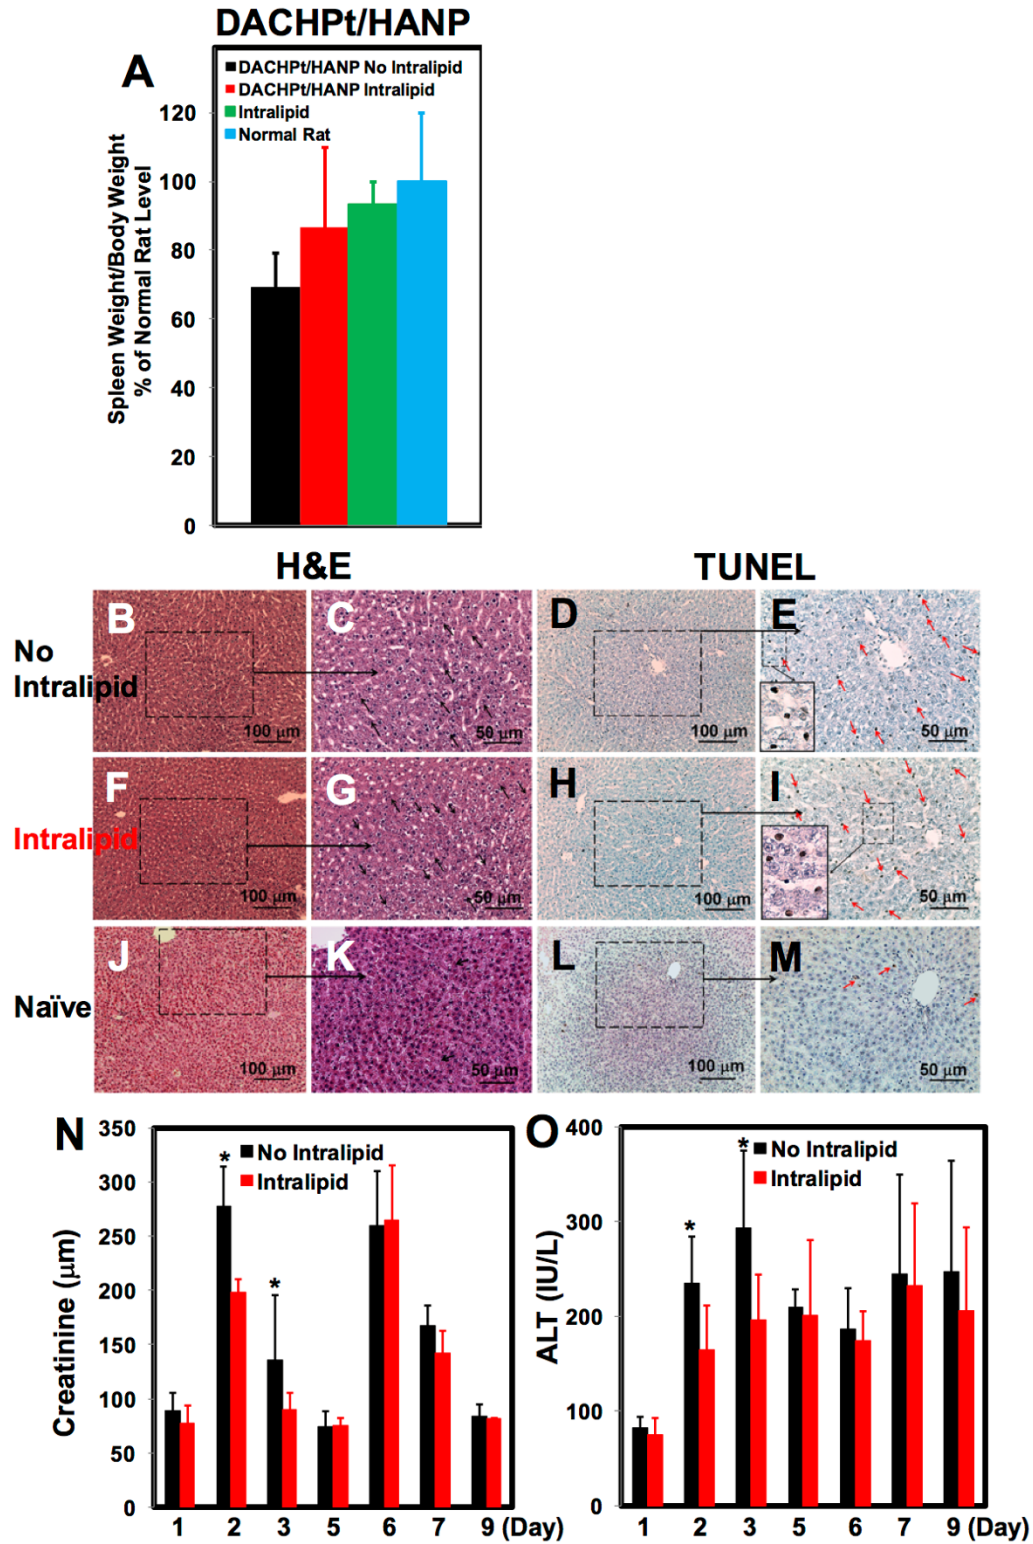

Fig S1.

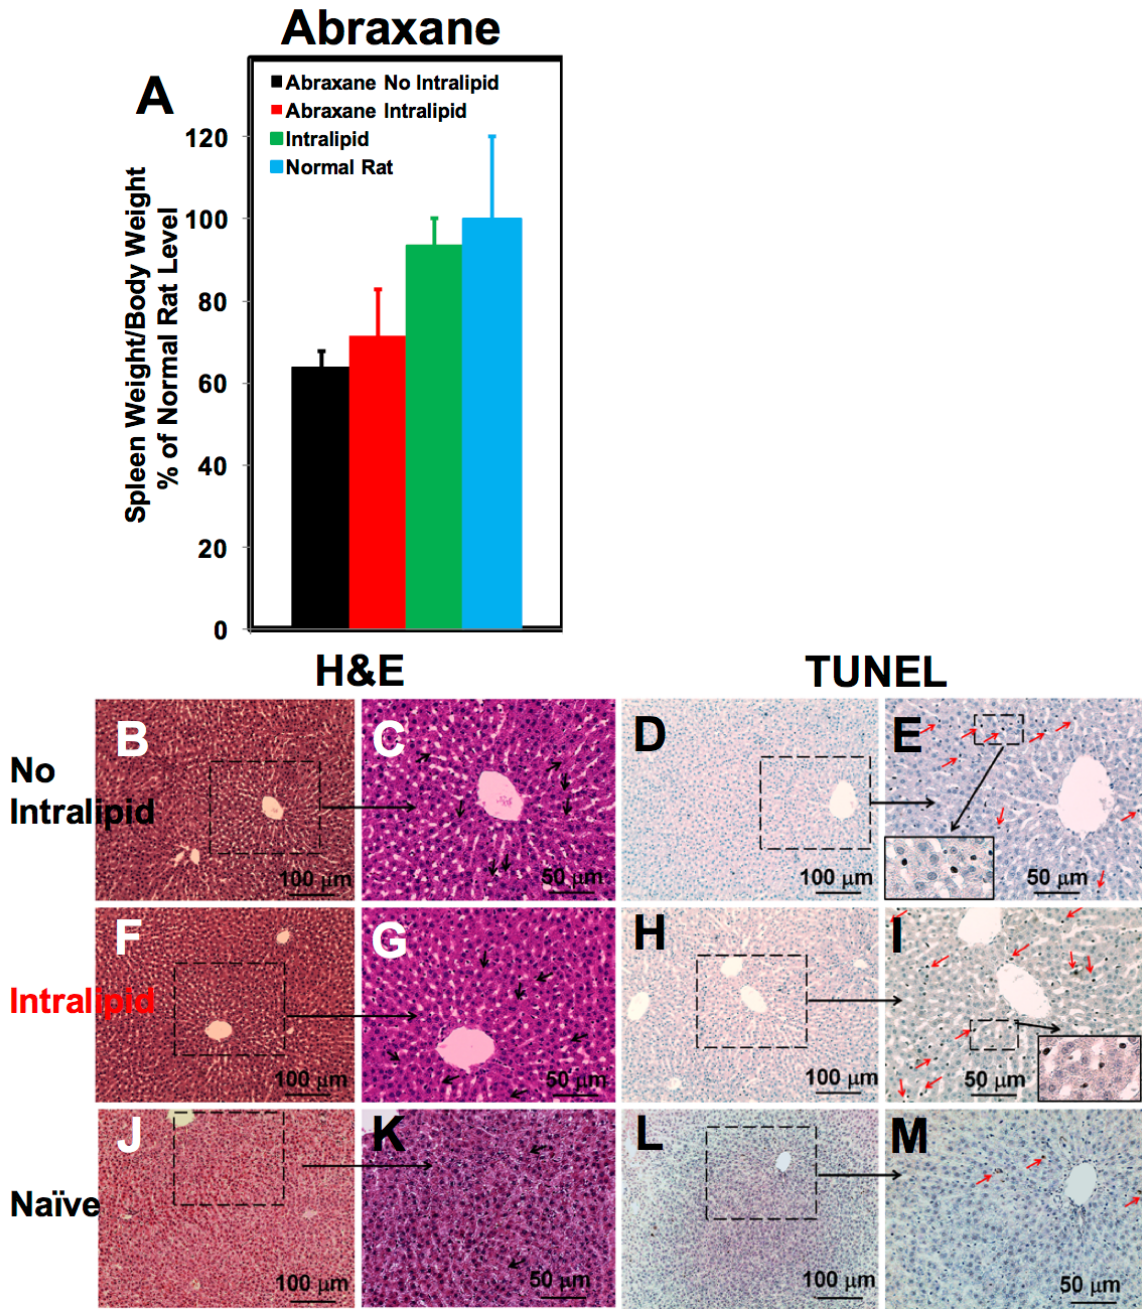

Fig S2.

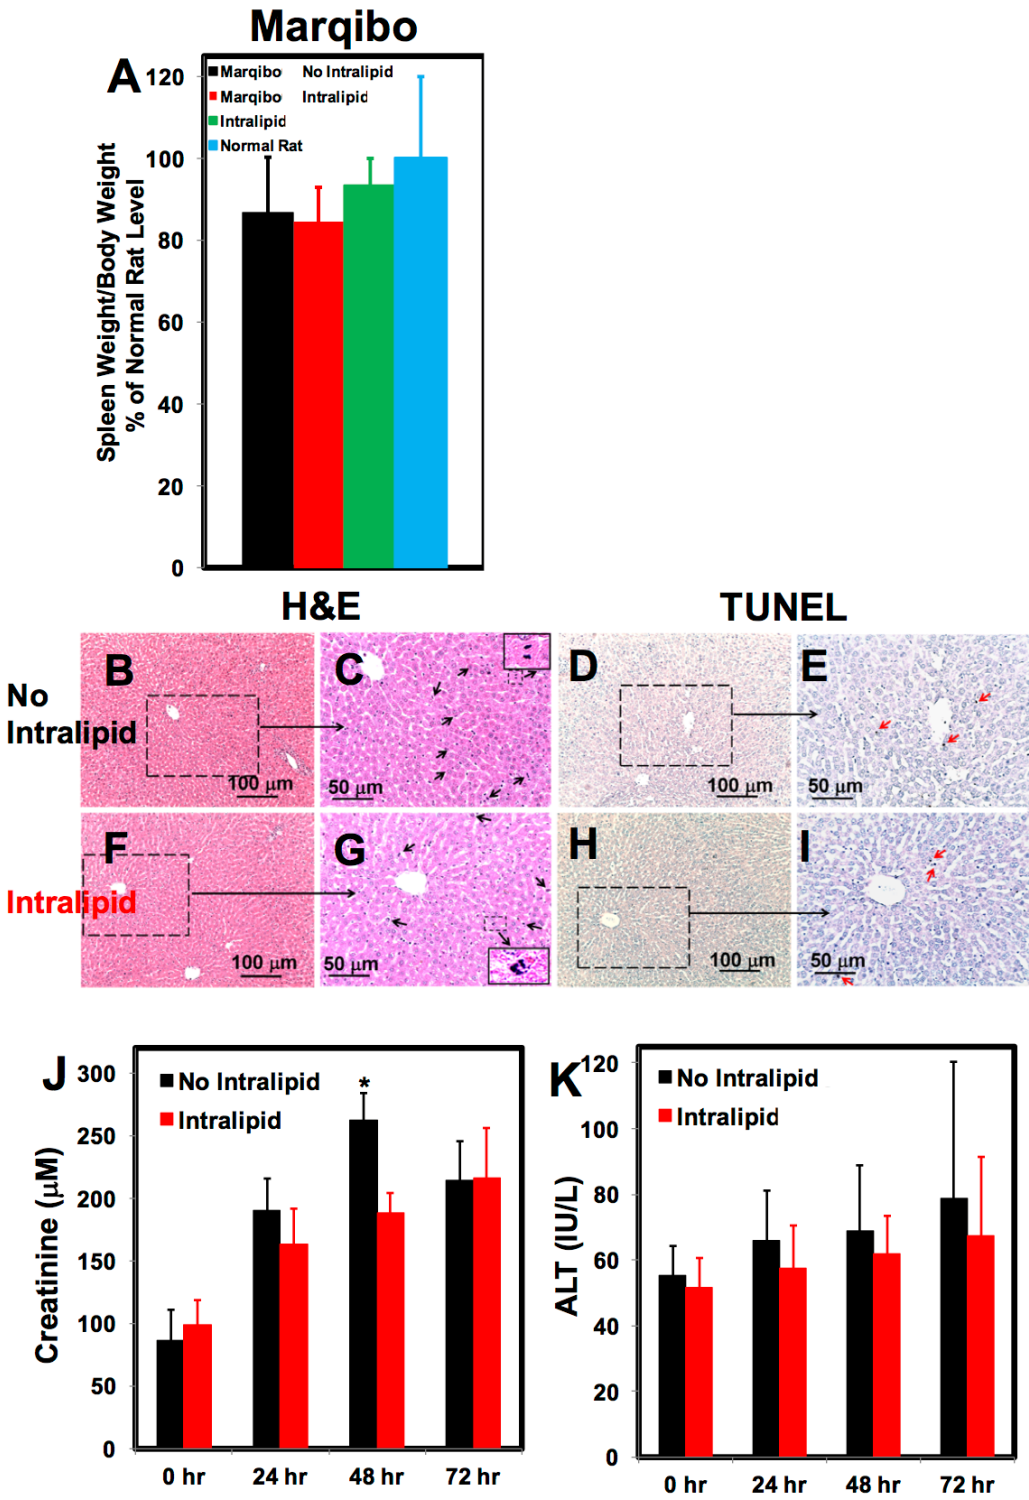

Fig S3.

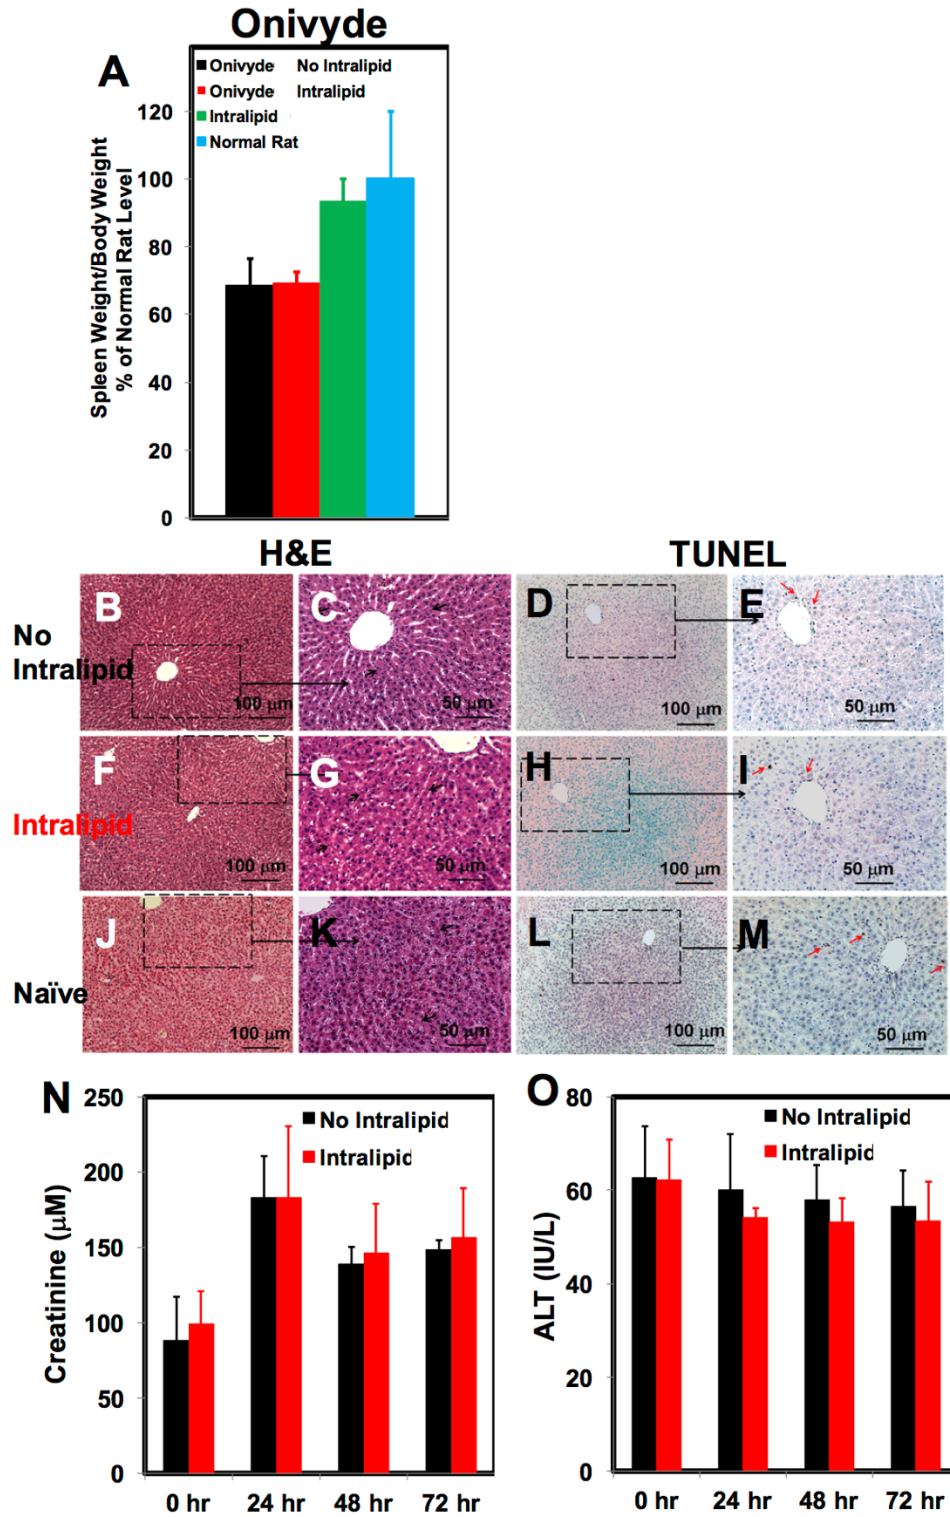

Fig S4.



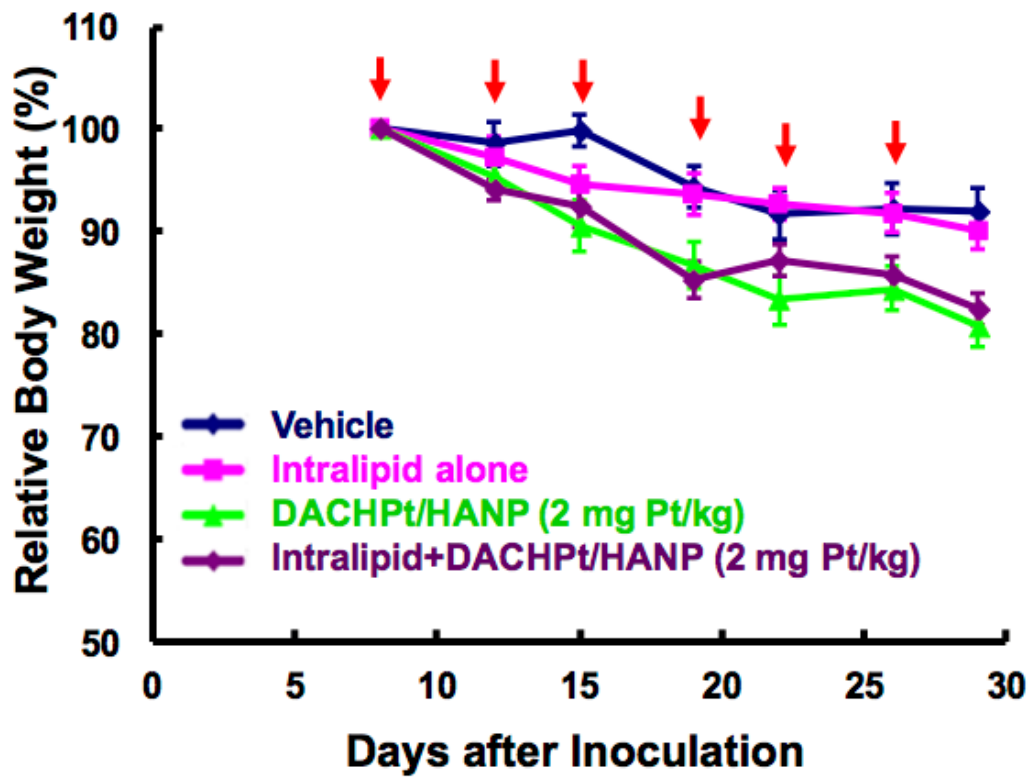

Fig S5.
